# Supplementary material for: New Insight on Archaeological Metal Finds, Nails and Lead Sheathings of the Punic Ship from Battle of the Egadi Islands
Source: MDPI journal article supplement (doi:10.3390/molecules28041968), 2023-02-19
Supplement: s1 [file s1]

---

## Support information

# New Insight on Archaeological Metal Finds, Nails and Lead Sheathings of the Punic Ship from Battle of the Egadi Islands

Francesco Armetta <sup>1</sup>, Rosina Celeste Ponterio <sup>2</sup>, Ivana Pibiri <sup>1</sup> and Maria Luisa Saladino <sup>1,\*</sup>

<sup>1</sup> Department Biological, Chemical and Pharmaceutical Science and Tecnology, University of Palermo  
Viale delle Scienze Bld. 17, 90128 Palermo, Italy

<sup>2</sup> CNR—Institute for Chemical Physical Processes, Viale Ferdinando Stagno D’Alcontres 37,  
98158 Messina, Italy

\* Correspondence: marialuisa.saladino@unipa.it

## Tables

**Table S1.** Net area percentage of the element's peaks identified in the XRF spectra of the nails.

|               | Area % |        |        |        |       |       |        |
|---------------|--------|--------|--------|--------|-------|-------|--------|
|               | As K12 | Ca K12 | Cu K12 | Fe K12 | Pb L1 | S K12 | Sr K12 |
| 1_body        | 0.47   | 9.54   | 80.00  | 6.89   | 0.88  | 1.78  | 0.44   |
| 1_tip         | 0.32   | 2.55   | 93.34  | 3.06   | 0.17  | 0.45  | 0.10   |
| 1_head        | 0.16   | 1.83   | 95.20  | 1.77   | 0.30  | 0.71  | 0.04   |
| 2_tip         | 0.40   | 2.92   | 88.18  | 7.37   | 0.24  | 0.82  | 0.08   |
| 3_body white  | 0.82   | 46.82  | 45.79  | 0.63   | 4.14  | 1.41  | 0.39   |
| 3_body red    | 0.50   | 52.43  | 29.19  | 8.48   | 6.71  | 2.27  | 0.42   |
| 3_body        | 0.45   | 12.61  | 80.57  | 0.77   | 3.15  | 1.95  | 0.49   |
| 3_tip inner   | 1.35   | 24.11  | 68.96  | 0.54   | 2.79  | 1.51  | 0.74   |
| 3_tip         | 0.21   | 1.81   | 95.06  | 0.73   | 1.05  | 1.12  | 0.03   |
| 3_head        | 0.73   | 15.92  | 76.80  | 1.35   | 2.07  | 2.24  | 0.90   |
| 5_nail broken | 0.44   | 11.13  | 77.86  | 4.98   | 1.32  | 4.04  | 0.24   |
| 5_tip nail    | 0.30   | 1.81   | 79.70  | 16.45  | 0.31  | 1.32  | 0.11   |
| 5_head nail   | 0.08   | 1.21   | 96.09  | 1.50   | 0.09  | 0.99  | 0.04   |
| 7_head        | 0.40   | 8.73   | 82.69  | 2.60   | 3.72  | 1.59  | 0.27   |
| 7_head broken | 0.48   | 0.91   | 96.46  | 0.40   | 0.69  | 1.05  | 0.02   |
| 8_yellow      | 0.20   | 0.90   | 26.98  | 68.52  | 1.38  | 1.88  | 0.14   |
| 8_head        | 0.94   | 3.57   | 78.73  | 10.87  | 3.87  | 1.82  | 0.20   |
| ship_1        | 0.12   | 1.51   | 93.71  | 3.32   | 0.25  | 1.04  | 0.05   |
| ship_2        | 1.58   | 1.29   | 59.80  | 0.80   | 33.56 | 2.87  | 0.08   |
| ship_3        | 0.48   | 3.09   | 94.20  | 1.17   | 0.67  | 0.30  | 0.09   |
| ship_4        | 1.10   | 0.76   | 68.10  | 0.99   | 27.25 | 1.71  | 0.08   |
| ship_5        | 0.88   | 0.62   | 74.31  | 0.97   | 21.83 | 1.32  | 0.08   |
| ship_6        | 0.09   | 0.33   | 96.02  | 1.02   | 1.88  | 0.64  | 0.02   |
| ship_7        | 0.20   | 0.30   | 94.31  | 1.80   | 2.64  | 0.71  | 0.03   |
| ship_8        | 0.16   | 0.88   | 92.37  | 2.33   | 3.99  | 0.23  | 0.03   |
| ship_9        | 0.14   | 3.69   | 92.12  | 2.27   | 0.97  | 0.63  | 0.17   |
| ship_10       | 0.20   | 1.19   | 93.23  | 1.74   | 2.49  | 1.12  | 0.03   |
| ship_11       | 0.31   | 0.22   | 95.85  | 0.73   | 2.19  | 0.69  | 0.01   |
| ship_12       | 0.46   | 0.95   | 84.20  | 1.91   | 11.44 | 0.97  | 0.07   |
| ship_13       | 0.24   | 2.96   | 91.15  | 2.28   | 2.04  | 1.30  | 0.04   |
| ship_14       | 0.40   | 1.17   | 90.98  | 4.21   | 2.84  | 0.30  | 0.10   |

## Figures

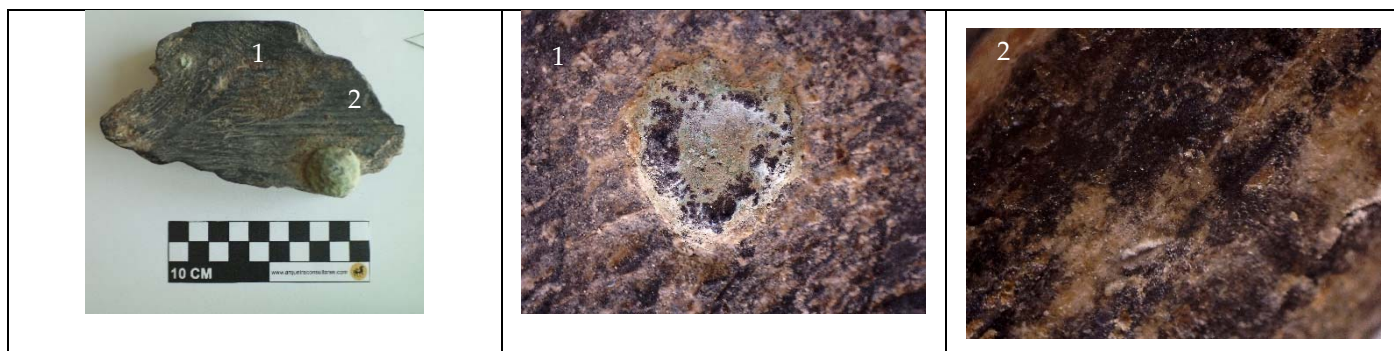

**Figure S1.** Photo of a nail inserted in a wood fragment and two details of the surface.

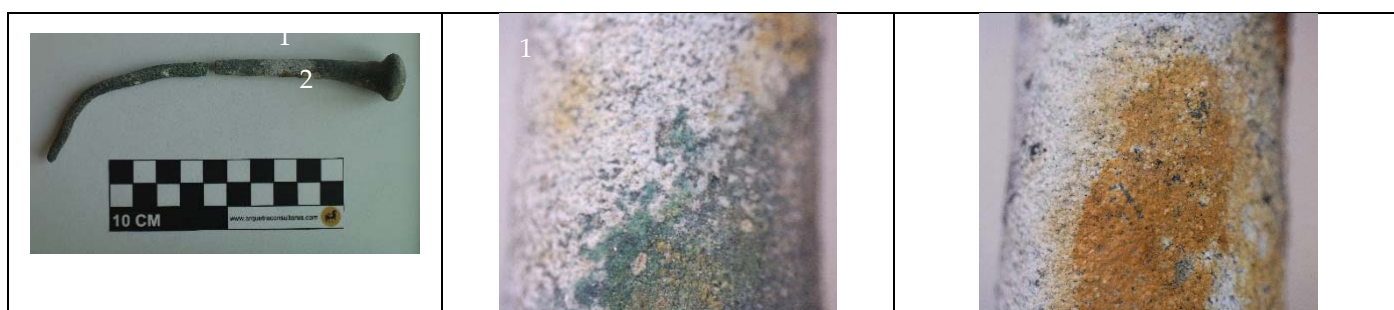

**Figure S2.** Photo of a nail and two details of the surface.

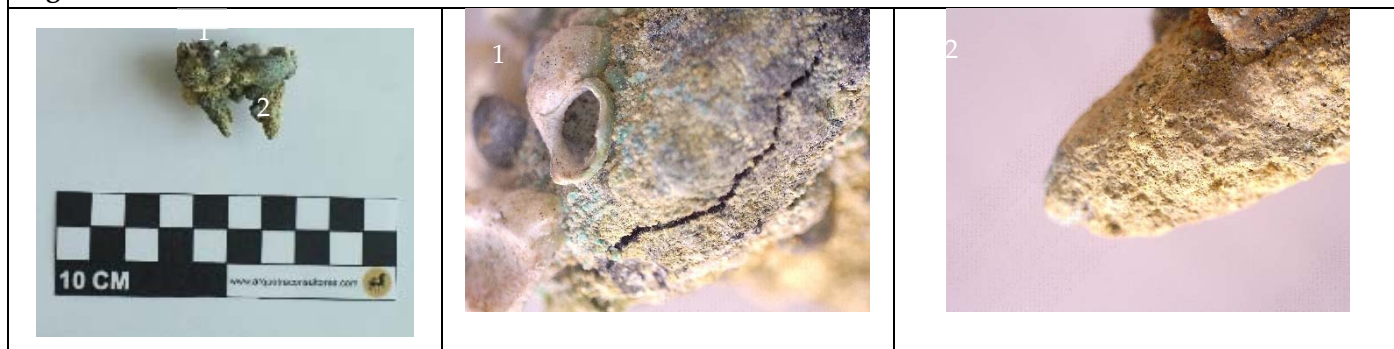

**Figure S3.** Photo of the two twin nails and two details of the surface.

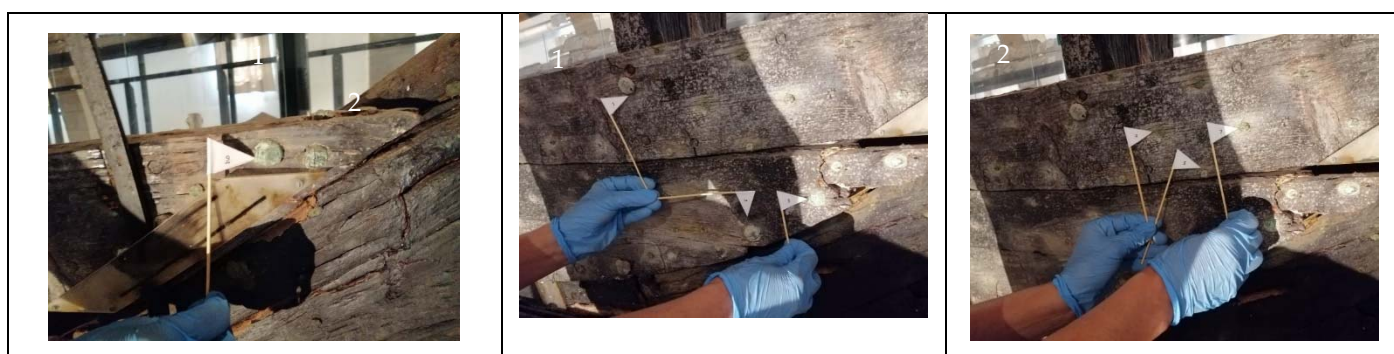

**Figure S4.** Photo of some nails inserted in the wreck of the ship, analysed by portable XRF.

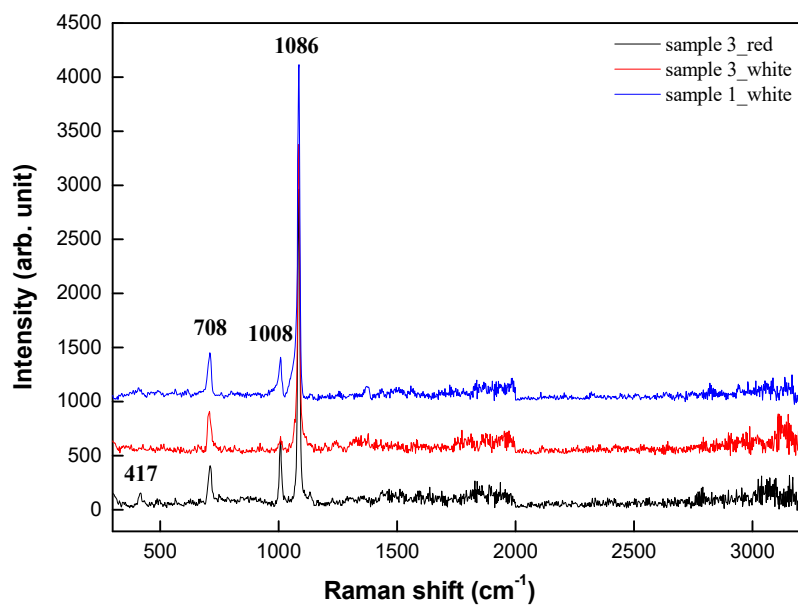

**Figure S5.** Raman spectra of some nails. The spectra of sample 3\_red and sample 3\_white are acquired on the red and white areas reported in Figure S2. The spectrum of sample 1\_white is acquired on the white area reported in Figure S4.

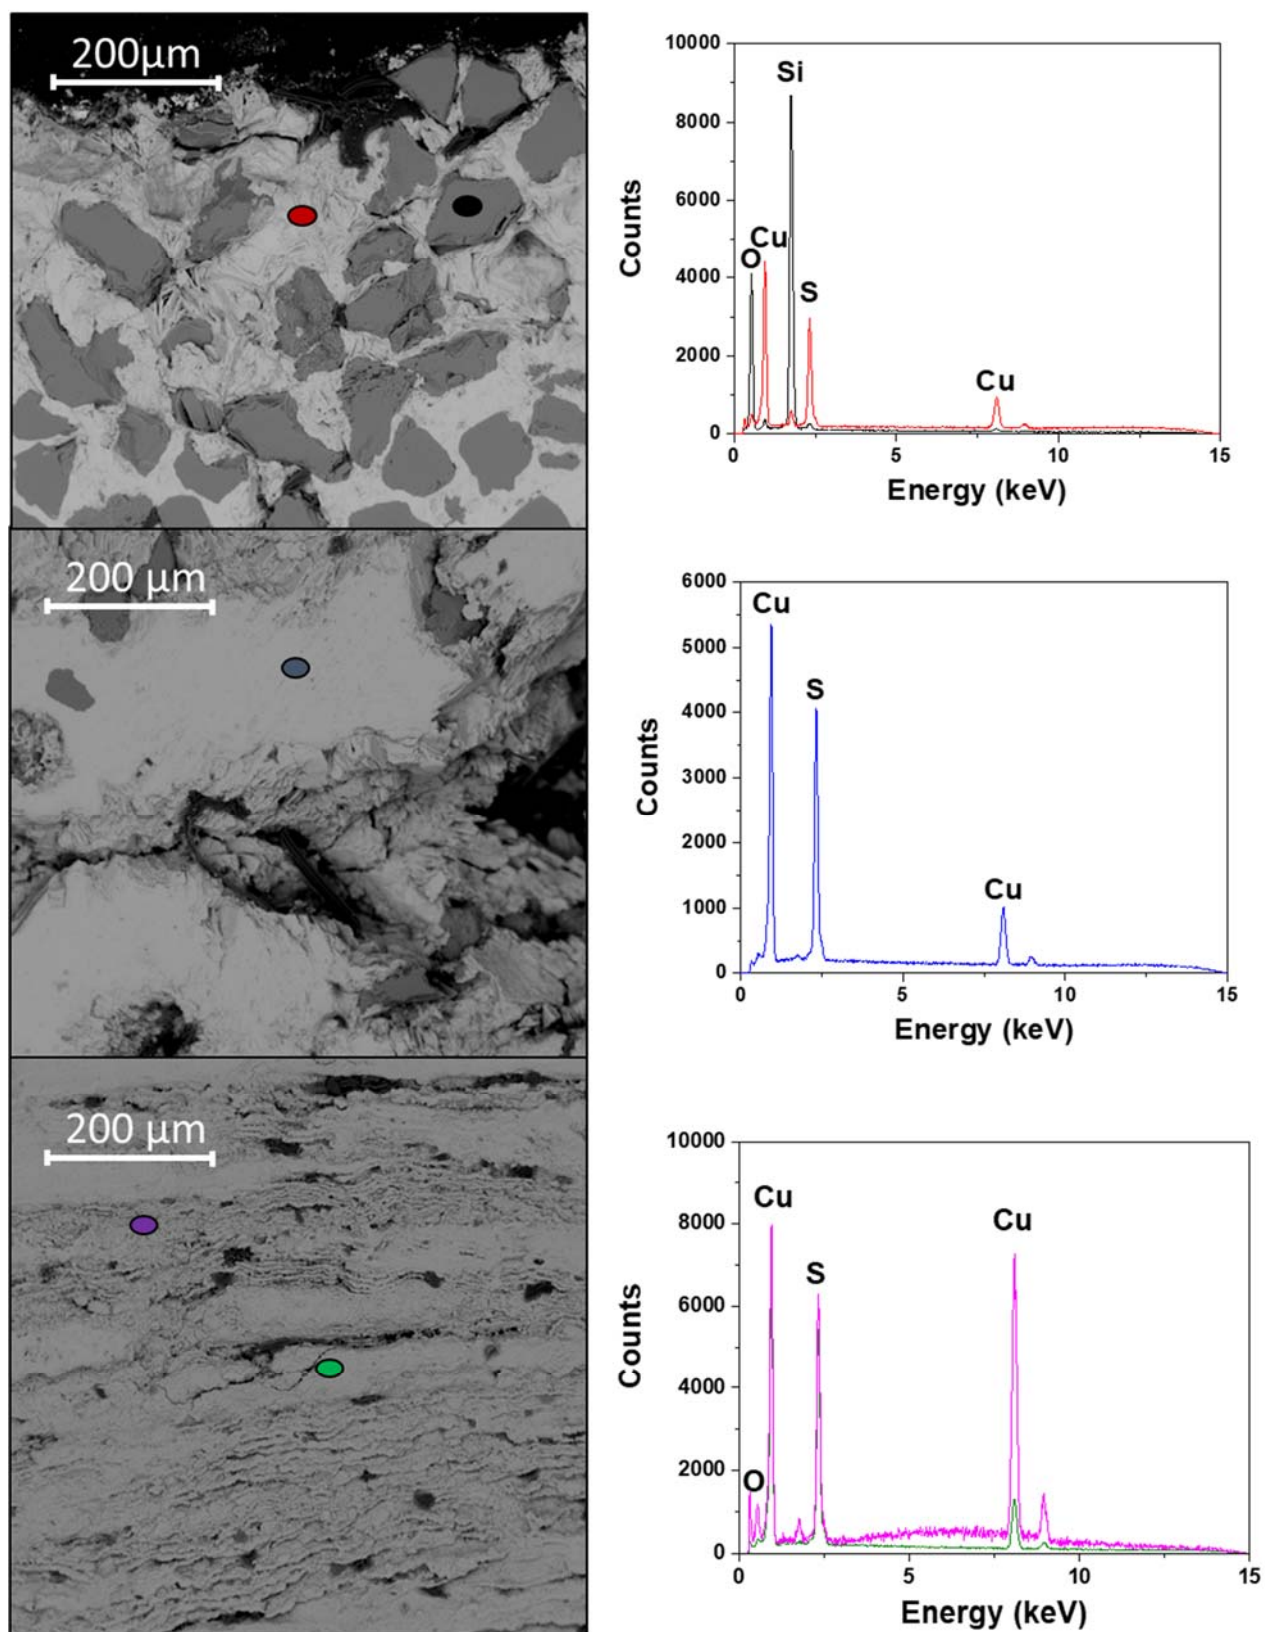

Figure S6. EDS acquired on the spot indicated on SEM micrographs.
